# Supplementary material for: TUSC2 downregulates PD-L1 expression in non-small cell lung cancer (NSCLC)
Source: Oncotarget. 2017 Nov 21;8(64):107621–9. doi: 10.18632/oncotarget.22581 (PMC5746095; doi:10.18632/oncotarget.22581)
Supplement: Supplementary file 1 [file oncotarget-08-107621-s001.pdf]

## TUSC2 downregulates PD-L1 expression in non-small cell lung cancer (NSCLC)

### SUPPLEMENTARY MATERIALS

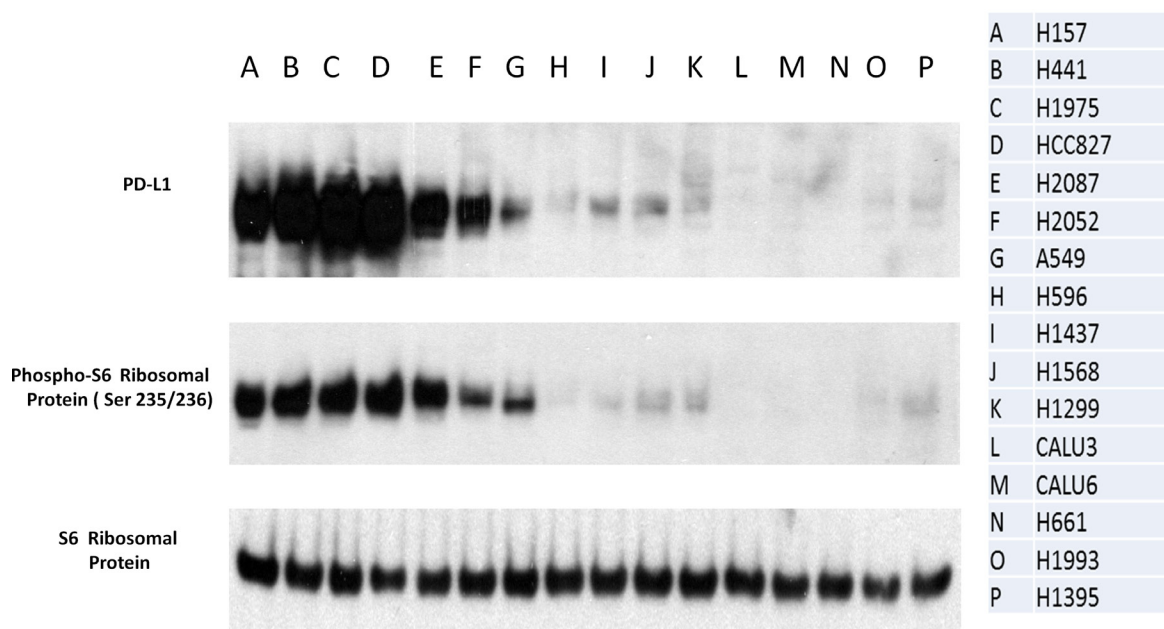

**Supplementary Figure 1: Baseline expression of PD-L1 and mTOR activities.** PD-L1 expressions in sixteen lung cancer cell lines, including H157, H1975, and HCC827, were evaluated by western blotting using anti-PD-L1 antibody. Among these cell lines, mTOR activities were measured via anti- Phospho-S6 Ribosomal Protein (Ser 235/236) western blotting. S6 Ribosomal protein was used as loading control.

## PBS control

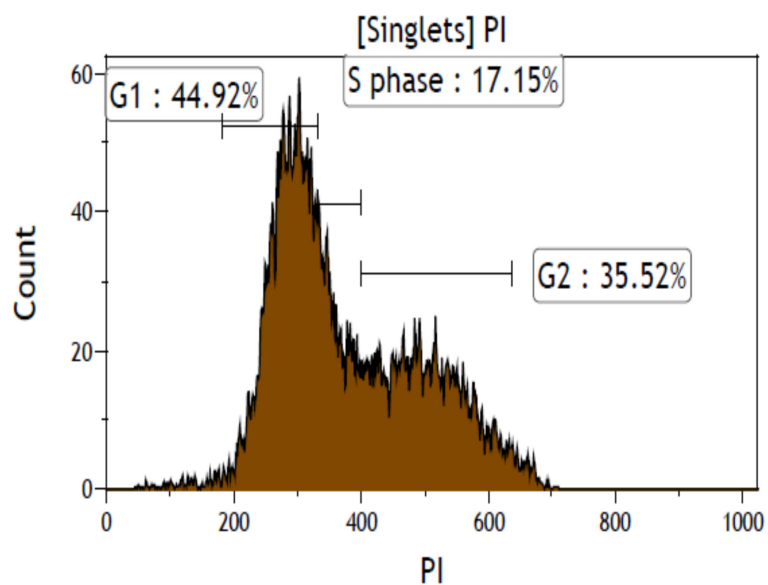

## TUSC2 induction via Doxycycline

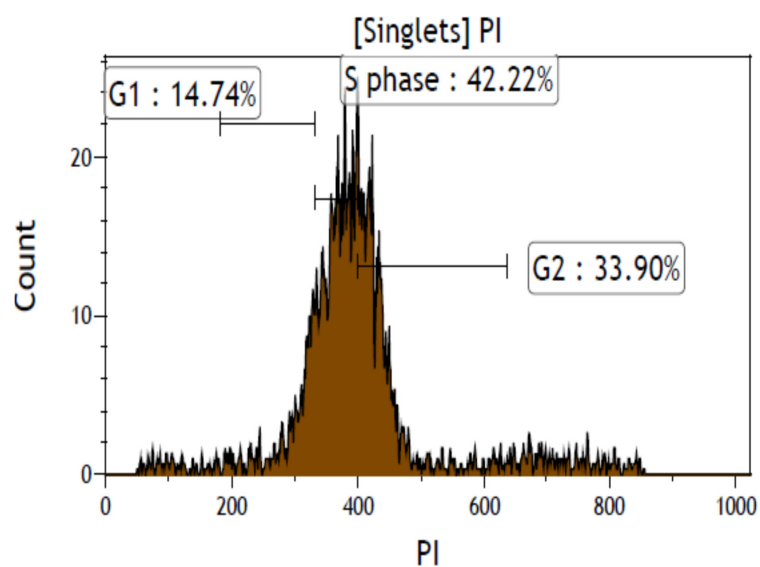

**Supplementary Figure 2: TUSC2 induction led to cell cycle arrest.** Tet-inducible TUSC2 H1299 clones exposed to 1  $\mu\text{g/mL}$  doxycycline or PBS control for 48 hours and then stained with propidium iodide. The DNA content was analyzed by flow cytometry.

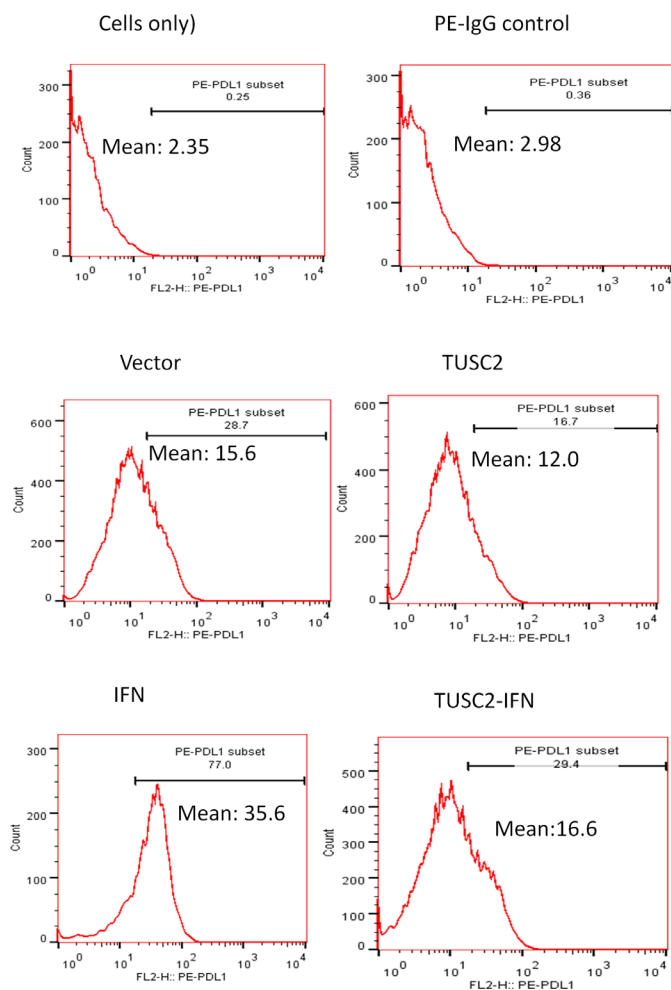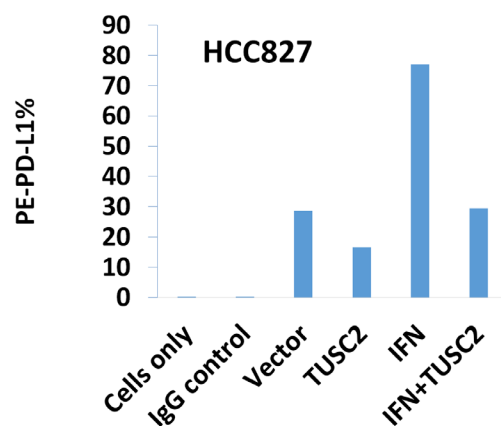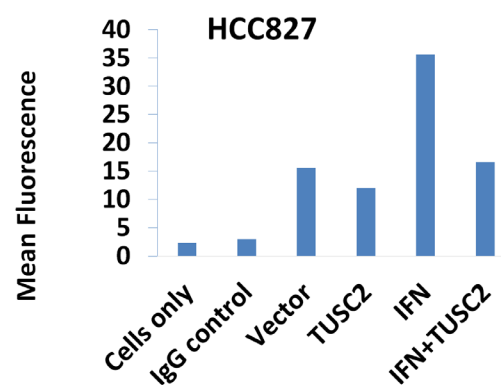

**Supplementary Figure 3: Flow cytometry analysis of PDL-L1 expression in HCC827 cells with or without TUSC2 transfection and IFN- $\gamma$ .** HCC827 cells were transiently transfected with 4  $\mu$ g of TUSC2 cDNA, then treated with 10 ng/mL IFN- $\gamma$  or control phosphate-buffered saline for 24 hours. Cell surface PD-L1 in these groups were measured via flow cytometry.
